# Supplementary material
Source: PubMed Central journal article supplement (PMC2711441)

# Supplementary Figure 1

## Jagged-1

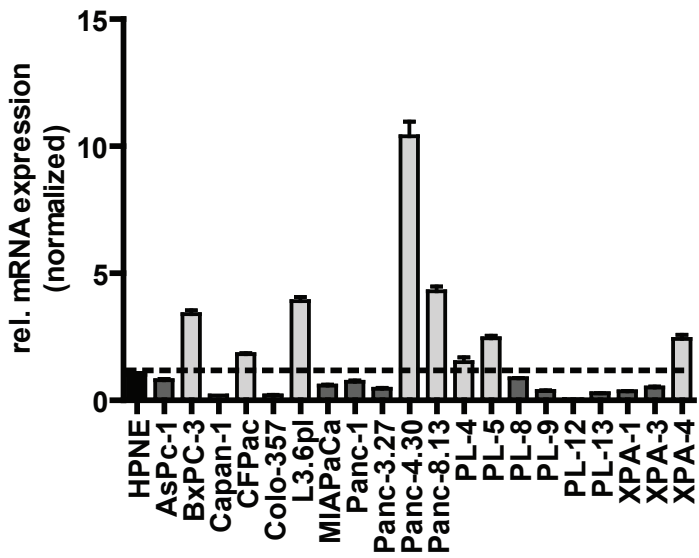

## DLL-1

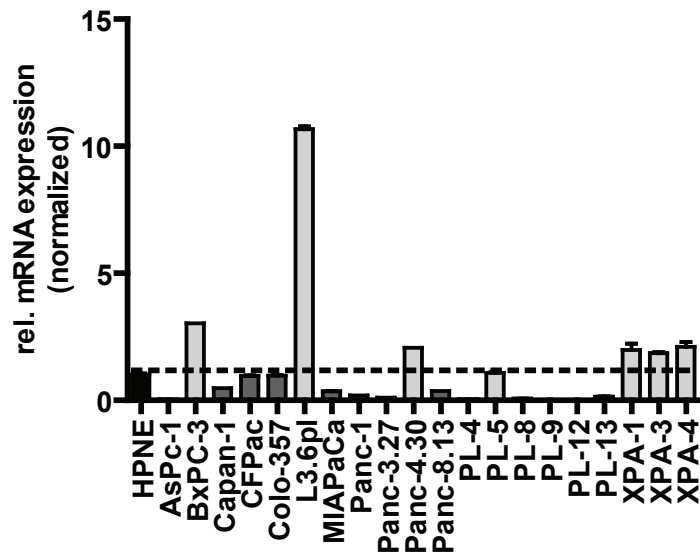

## DLL3

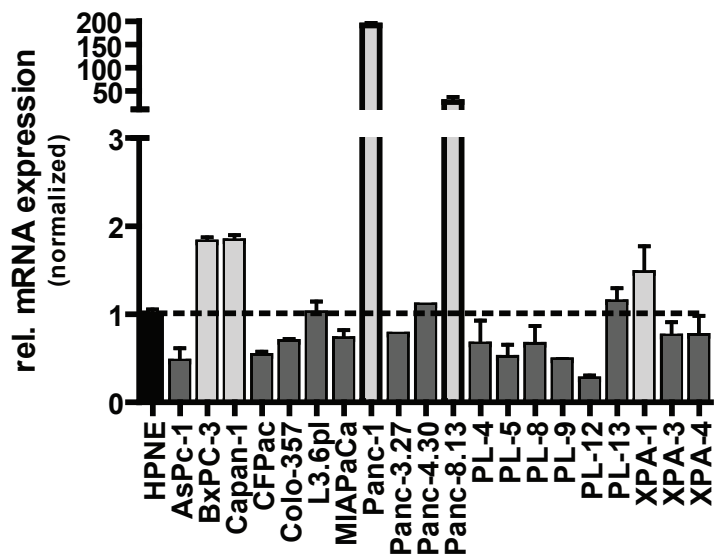

Supplement: NIHMS97887-supplement-SuppFig.pdf [file NIHMS97887-supplement-SuppFig.pdf]
